# Supplementary material
Source: publisher figshare collection journal article supplement (https://gsajournals.figshare.com/ndownloader/files/35373766)
Supplement: Supplementary file 1 [file 35373766]

## Sheet: Supplementary Table S6
Supplementary Table S6. Joint-linkage QTL results of nine tocochromanol grain phenotypes analyzed in the maize NAM panel (Diepenbrock et al., 2017) uplifted from RefGen_v2 to v4
Common support interval ID	NAM JL-QTL ID	Phenotype	Marker at the peak	Peak marker chr v2	Peak marker position, cM	Peak marker position v2 (bp)	Support interval (α = 0.01), left bound v2 (bp)	Support interval (α = 0.01), right bound v2 (bp)	Number of SNP-trait associations	Common support interval left bound v2 (bp)	Common support interval right bound v2 (bp)	P-value in JL model	PVE (%)	Peak marker LOD score	a priori gene in support interval	Number of NAM families with QTL	NAM families with QTL	Minimum allelic effect estimate (AEE)	NAM family with minimum AEE	Maximum AEE	NAM family with maximum AEE	Peak marker position v4 (bp)	Support interval (α = 0.01), left bound v4 (bp)	Support interval (α = 0.01), right bound v4 (bp)	Common support interval left bound v4 (bp)	Common support interval right bound v4 (bp)
1	NAM_JL_1	δΤ3	S_5804545	1	10.2	5804545	5266669	6234332	6	5266669	6234332	1.2e-20	0.0221805	41.0703	NA	9	CML333, CML69, Il14H, Ki3, Mo18W, MS71, Oh43, Tx303, Tzi8	-0.114364	CML52	0.391218	TX303	5878336	5325524	6310517	5325524	6310517
2	NAM_JL_2	γΤ	S_12293829	1	24.4	12293829	8640669	19660509	6	8640669	21692577	2.41e-07	0.01025	19.24	solanesyl diphosphate synthase	3	CML247, CML333, P39	-4.11	P39	1.65	OH43	12487465	8685603	19995529	8685603	21988874
2	NAM_JL_2	δΤ3	S_16005600	1	32	16005600	15948021	21692577	3	8640669	21692577	1.89e-08	0.0119439	21.5071	NA	6	CML103, CML333, CML69, Hp301, Il14H, MS71	-0.234623	CML69	0.0569381	TX303	16242583	16123277	21988874	8685603	21988874
3	NAM_JL_3	αΤ	S_30027714	1	48.9	30027714	27014736	37619259	4	27014736	38932354	2.12e-15	0.01213	29.53	chorismate synthase	5	CML103, IL14H, KI11, MS71, NC350	-0.25	TX303	1.72	CML103	30335404	27148354	38325312	27148354	39297589
3	NAM_JL_3	ΣTT3	S_32578218	1	51.6	32578218	30311103	37619259	3	27014736	38932354	2.48e-12	0.0153	26.56	chorismate synthase	5	CML103, CML322, CML69, KI11, KY21	-6.05	CML69	7.77	KY21	32857956	30572906	38325312	27148354	39297589
3	NAM_JL_3	δΤ	S_32200366	1	51.2	32200366	30594493	35758554	2	27014736	38932354	1.54e-09	0.01256	22.23	chorismate synthase	6	CML322, CML333, CML69, KI11, KI3, KY21	-0.48	CML69	0.43	KI3	32475241	30846816	35946062	27148354	39297589
3	NAM_JL_3	ΣT	S_33258826	1	52.5	33258826	31539124	37154083	3	27014736	38932354	3.1e-19	0.01916	35.59	chorismate synthase	7	CML103, CML277, CML333, CML69, KI11, KY21, P39	-4.46	CML69	7.06	KY21	33664200	31849170	37532544	27148354	39297589
3	NAM_JL_3	γΤ	S_32578218	1	51.6	32578218	31822513	35758554	2	27014736	38932354	5.26e-18	0.01909	34.62	chorismate synthase	8	CML103, CML322, CML333, CML69, HP301, KI11, KY21, P39	-3.67	CML69	7.27	KY21	32857956	32032680	35946062	27148354	39297589
3	NAM_JL_3	αΤ3	S_37464200	1	55.7	37464200	35913613	38932354	1	27014736	38932354	9.42e-12	0.01206	25.24	NA	8	IL14H, KY21, MO18W, NC358, OH7B, P39, TX303, TZI8	-0.52	M162W	0.78	P39	37830162	35791680	39297589	27148354	39297589
4	NAM_JL_4	ΣT3	S_77561162	1	79.9	77561162	67831480	107187523	4	67831480	179717483	6.98e-11	0.01033	23.29	NA	6	CML228, CML247, CML69, KY21, M162W, P39	-2.08	KY21	0.4	TX303	79095829	68998108	109743956	68998108	181712459
4	NAM_JL_4	γΤ3	S_77561162	1	79.9	77561162	73182952	84610081	5	67831480	179717483	1.55e-33	0.02013	52.52	NA	16	B97, CML228, CML247, CML277, CML333, CML69, HP301, IL14H, KY21, M162W, M37W, MS71, NC350, NC358, OH7B, P39	-2.89	P39	0.26	CML52	79095829	73984371	86332242	68998108	181712459
4	NAM_JL_4	ΣTT3	S_173178805	1	94	173178805	90154344	177001028	8	67831480	179717483	2.68e-10	0.01339	23.62	3-deoxy-d-arabino-heptulosonate 7-phosphate synthase, MPBQ/MSBQ methyl transferase (VTE3)	5	CML333, M162W, NC350, OH7B, TX303	-6.65	OH7B	1.51	HP301	174821308	91854164	180044374	68998108	181712459
4	NAM_JL_4	δΤ3	S_174102804	1	94.3	174102804	170714809	179717483	5	67831480	179717483	1.71e-25	0.0214373	49.7172	MPBQ/MSBQ methyl transferase (VTE3)	11	CML228, CML322, CML333, CML69, Hp301, Ki11, Mo18W, MS71, Oh43, Oh7B, Tzi8	-0.144184	OH7B	0.326661	TZI8	176082485	172284874	181712459	68998108	181712459
4	NAM_JL_4	δΤ	S_174102804	1	94.3	174102804	173178805	175026802	1	67831480	179717483	1.23e-102	0.08163	136.26	MPBQ/MSBQ methyl transferase (VTE3)	17	CML103, CML228, CML247, CML277, CML322, CML333, CML69, IL14H, KI11, KY21, M37W, MO18W, NC350, NC358, OH43, P39, TX303	-0.92	MO18W	0.18	KI3	176082485	174821308	177265004	68998108	181712459
5	NAM_JL_5	δΤ3	S_227978512	1	134.4	227978512	218577918	230916658	5	218577918	236300075	8.32e-11	0.0116631	27.0453	NA	6	B97, CML103, Ky21, Oh43, P39, Tx303	-0.166555	CML69	0.218489	B97	231602561	221825332	234600328	221825332	239783178
5	NAM_JL_5	γΤ3	S_228086777	1	134.5	228086777	225130631	234257008	5	218577918	236300075	3.48e-06	0.00622	16.61	NA	5	CML228, HP301, KI11, KY21, P39	-0.7	M162W	1.63	P39	231816967	228781410	237883269	221825332	239783178
5	NAM_JL_5	δΤ	S_227227502	1	133.8	227227502	225969379	228086777	7	218577918	236300075	1.08e-71	0.05885	99.97	NA	9	B97, CML322, CML52, KY21, M162W, M37W, MO18W, MS71, OH7B	-0.84	OH7B	0.21	CML69	230624508	229419828	231816967	221825332	239783178
5	NAM_JL_5	γΤ	S_227227502	1	133.8	227227502	226179066	227978512	11	218577918	236300075	1.89e-163	0.10844	210.16	NA	13	B97, CML103, CML247, CML322, CML52, IL14H, KY21, M162W, M37W, MO18W, MS71, OH43, OH7B	-17.04	B97	1.82	CML228	230624508	229766130	231602561	221825332	239783178
5	NAM_JL_5	ΣT	S_227227502	1	133.8	227227502	226179066	227978512	8	218577918	236300075	6.48e-137	0.09987	175.7	NA	12	B97, CML103, CML322, CML52, IL14H, KY21, M162W, M37W, MO18W, MS71, OH43, OH7B	-17.85	B97	1.89	TX303	230624508	229766130	231602561	221825332	239783178
5	NAM_JL_5	ΣTT3	S_228086777	1	134.5	228086777	227545454	228563313	6	218577918	236300075	5.97e-66	0.05525	94.22	NA	8	B97, CML103, CML322, KY21, M162W, M37W, MS71, OH7B	-17.59	B97	4.53	P39	231816967	231160246	232176626	221825332	239783178
5	NAM_JL_5	αΤ	S_230132209	1	136.3	230132209	228254601	236300075	3	218577918	236300075	1.24e-13	0.0114	27.18	NA	7	B97, CML103, CML247, IL14H, KI3, M162W, MS71	-0.91	MS71	1.07	CML247	233667712	231865879	239783178	221825332	239783178
6	NAM_JL_6	αΤ3	S_259191668	1	155.1	259191668	253503595	262168484	3	253503595	262168484	2.17e-13	0.01784	27.53	NA	6	B97, CML277, M162W, NC350, NC358, P39	-1.05	NC358	1.12	P39	263865180	257764918	266974887	257764918	266974887
7	NAM_JL_7	αΤ3	S_280349239	1	172.7	280349239	278547360	281159169	3	278547360	281159169	2.45e-10	0.01494	23.22	NA	6	B97, CML247, MS71, NC350, NC358, P39	-1.3	B97	0.86	NC350	285477412	283601020	286260528	283601020	286260528
8	NAM_JL_8	δΤ3	S_289692611	1	185.1	289692611	288374247	292184260	4	288374247	292184260	2.83e-06	0.00819113	19.7582	NA	2	CML247, Ki11	-0.182692	CML247	0.119777	CML69	295108012	293728449	297705115	293728449	297705115
9	NAM_JL_9	ΣT	S_22420256	2	53.6	22420256	19999945	28251565	1	19999945	28251565	9.27e-11	0.01266	23.98	NA	6	B97, CML277, CML69, MO18W, OH43, TX303	-5.37	MO18W	1.74	TZI8	23684495	21260551	29683951	21260551	29683951
10	NAM_JL_10	γΤ3	S_39891173	2	67.5	39891173	28800654	148933703	5	28800654	148933703	3.06e-07	0.00681	18.26	arogenate/prephenate dehydratase	4	CML277, CML333, CML69, KY21	-0.84	IL14H	2.06	CML69	41524155	30112000	153520075	30112000	153520075
10	NAM_JL_10	δΤ	S_37143380	2	65.7	37143380	29544486	41928889	2	28800654	148933703	9.19e-11	0.0132	24.02	NA	6	CML103, KI3, MO18W, MS71, OH43, TX303	-0.36	MO18W	0.16	OH7B	38693658	30989567	43951038	30112000	153520075
10	NAM_JL_10	γΤ	S_32255033	2	62.8	32255033	31291485	33218582	0	28800654	148933703	2.75e-13	0.01378	28.09	NA	5	CML103, CML69, KI3, MO18W, OH43	-4.78	OH43	-0.24	CML228	33762185	32816147	34939037	30112000	153520075
10	NAM_JL_10	ΣT3	S_40196483	2	67.7	40196483	37906656	56927400	6	28800654	148933703	2.69e-08	0.00868	19.61	NA	4	CML333, CML69, KY21, TZI8	-1.06	M37W	2.95	CML69	41679059	39494916	59002826	30112000	153520075
10	NAM_JL_10	αΤ3	S_39280552	2	67.1	39280552	38822587	42947348	1	28800654	148933703	2.87e-09	0.01024	21.67	NA	7	B97, CML322, CML52, CML69, MS71, TX303, TZI8	-0.59	CML52	0.72	MS71	40873544	40085536	44986915	30112000	153520075
11	NAM_JL_11	ΣTT3	S_185246926	2	92.1	185246926	178418396	192730097	6	178418396	201199142	5.09e-07	0.01176	18.6	NA	3	CML228, M162W, MS71	-3.17	CML103	5.38	CML228	190838155	183692522	198465666	183692522	207766644
11	NAM_JL_11	ΣT	S_195781723	2	103.9	195781723	188337590	201199142	4	178418396	201199142	4.35e-08	0.01894	20.02	3-dehydroquinate synthase	5	CML228, IL14H, M162W, NC350, OH43	-4.17	OH43	7.33	CML228	202030149	193686687	207766644	183692522	207766644
11	NAM_JL_11	γΤ	S_195781723	2	103.9	195781723	192283114	199691351	3	178418396	201199142	8.89e-10	0.01994	22.98	3-dehydroquinate synthase	7	CML228, IL14H, M162W, MO18W, MS71, NC350, OH43	-3.71	OH43	6.87	CML228	202030149	197911851	206200941	183692522	207766644
12	NAM_JL_12	ΣTT3	S_210003103	2	115.7	210003103	208919443	210154296	4	208919443	219772127	6.56e-40	0.03907	62.49	NA	13	B97, CML103, CML247, CML322, CML333, IL14H, KI11, M162W, M37W, MO18W, MS71, NC350, P39	-9.55	P39	-1.95	TZI8	216859504	215759449	217074631	215759449	226735235
12	NAM_JL_12	γΤ	S_209749910	2	115.5	209749910	209084703	210229893	5	208919443	219772127	9.47e-67	0.07575	95.76	NA	17	B97, CML103, CML228, CML247, CML277, CML322, CML69, HP301, IL14H, KI11, M162W, M37W, MO18W, MS71, NC350, OH7B, P39	-9.79	P39	-0.32	TZI8	216614573	215841739	217074631	215759449	226735235
12	NAM_JL_12	ΣT	S_209749910	2	115.5	209749910	209084703	210229893	7	208919443	219772127	1.17e-53	0.06792	78.34	NA	16	B97, CML103, CML228, CML247, CML277, CML322, CML69, IL14H, KI11, M162W, M37W, MO18W, MS71, NC350, OH7B, P39	-10.29	P39	-0.54	TZI8	216614573	215841739	217074631	215759449	226735235
12	NAM_JL_12	δΤ	S_210003103	2	115.7	210003103	209749910	210305490	7	208919443	219772127	1.48e-53	0.04398	78.35	NA	18	CML103, CML247, CML322, CML333, CML52, HP301, IL14H, KI11, KI3, M162W, M37W, MO18W, MS71, NC350, NC358, OH43, OH7B, P39	-0.63	KI11	-0.02	TZI8	216859504	216614573	217193988	215759449	226735235
12	NAM_JL_12	αΤ	S_210456683	2	116.3	210456683	210305490	213860237	5	208919443	219772127	5.38e-13	0.01054	26.32	NA	6	CML103, CML322, HP301, IL14H, KI3, MS71	-0.67	CML322	1.67	CML103	217268977	217074631	220761896	215759449	226735235
13	NAM_JL_13	γΤ	S_25884552	3	52.5	25884552	19661002	29482935	3	19661002	29482935	7.48e-09	0.01035	21.59	NA	6	KI11, M162W, NC358, P39, TX303, TZI8	-4.39	M162W	3.97	P39	25376343	19073804	29297108	19073804	29297108
13	NAM_JL_13	ΣT	S_24965860	3	52.2	24965860	23096593	29100089	3	19661002	29482935	2.02e-10	0.01278	23.49	NA	5	CML322, KI11, M162W, P39, TZI8	-4.62	M162W	6.29	P39	24482014	22558075	28716308	19073804	29297108
14	NAM_JL_14	δΤ3	S_58294211	3	57.6	58294211	29674357	114435699	0	29674357	149907321	3.15e-09	0.0101488	21.7325	1-deoxy-D-xylulose 5-phosphate reductoisomerase, geranylgeranyl hydrogenase, shikimate biosynthesis protein aroDE	7	B97, CML322, CML69, Hp301, Il14H, Ki11, M162W	-0.198994	CML69	0.125566	CML228	58289386	29297108	114791908	29297108	151226630
14	NAM_JL_14	ΣT3	S_144813964	3	63.8	144813964	64615276	149907321	3	29674357	149907321	1.06e-08	0.00888	20.2	shikimate biosynthesis protein aroDE, shikimate biosynthesis protein aroDE	4	B97, CML69, P39, TZI8	-2.59	P39	1.12	OH7B	145731266	64735837	151226630	29297108	151226630
14	NAM_JL_14	γΤ3	S_122684562	3	59.5	122684562	120327744	127614563	2	29674357	149907321	8.81e-08	0.00708	19.08	NA	5	CML277, CML69, KI11, KY21, OH7B	-2.21	CML277	1.69	KY21	122983210	119366410	128153998	29297108	151226630
14	NAM_JL_14	αΤ3	S_143898953	3	63.7	143898953	141994033	146643988	1	29674357	149907321	2.91e-38	0.02894	59.29	NA	11	B97, CML228, CML247, CML69, KI11, KY21, M37W, MS71, P39, TX303, TZI8	-1.73	B97	0.21	NC350	144768720	142868558	147771744	29297108	151226630
15	NAM_JL_15	αΤ	S_160847275	3	72.4	160847275	154570247	162970970	2	154570247	169277528	2.31e-11	0.01068	24.09	NA	2	CML322, M37W	-0.64	M37W	2.08	CML322	162450868	155991378	164634993	155991378	171881425
16	NAM_JL_16	δΤ	S_173244742	3	82.1	173244742	170726091	176049799	3	170726091	176049799	6.6e-10	0.01219	22.78	prephenate amino transferase	6	CML228, CML247, CML69, KY21, MO18W, TX303	-0.25	M162W	0.37	CML228	175450364	173274139	178605228	173274139	178605228
17	NAM_JL_17	ΣTT3	S_181011607	3	90.8	181011607	178145024	183318257	0	178145024	183318257	1.12e-07	0.01095	19.65	NA	3	CML247, CML277, P39	-6.47	CML277	3.55	MO18W	183972295	180966010	186277170	180966010	186277170
18	NAM_JL_18	αΤ	S_188410390	3	98	188410390	183433471	194881319	5	183433471	209007204	1.6e-10	0.01117	22.92	4-diphosphocytidyl-2-C-methyl-D-erythritol kinase, chorismate mutase	8	CML103, CML247, CML277, KY21, M37W, NC350, NC358, P39	-0.69	CML247	1.3	NC350	191144157	186277170	198067234	186277170	212598170
18	NAM_JL_18	ΣT	S_190652083	3	99.4	190652083	190011599	202343238	4	183433471	209007204	4.09e-09	0.01159	21.57	chorismate mutase	6	CML103, CML247, CML277, M37W, MO18W, P39	-4.62	P39	5.32	M37W	193726054	192750146	205554580	186277170	212598170
18	NAM_JL_18	γΤ	S_199624131	3	104.9	199624131	194012127	205546681	4	183433471	209007204	4.65e-07	0.00908	18.78	chorismate mutase	3	CML277, CML333, M37W	-4.29	CML277	4.53	M37W	202716366	196990591	209014863	186277170	212598170
18	NAM_JL_18	δΤ3	S_201306180	3	106.7	201306180	201264083	209007204	6	183433471	209007204	2.93e-06	0.008149	18.7894	NA	4	CML52, Il14H, NC358, Oh7B	-0.32149	CML277	0.202705	NC358	204494196	204451479	212598170	186277170	212598170
19	NAM_JL_19	αΤ3	S_229858254	3	153.8	229858254	227136056	232139823	4	227136056	232139823	1.11e-15	0.01464	30.65	NA	4	CML52, KI11, MO18W, OH7B	-1.36	KI11	0.49	KY21	233803505	230860333	234552234	230860333	234552234
20	NAM_JL_20	αΤ	S_13319985	4	35.2	13319985	10788932	14334974	6	10788932	14334974	2.9e-23	0.01773	39.6	NA	5	CML322, MS71, OH43, P39, TZI8	-1.03	MS71	2.5	TZI8	14246626	11672247	15436423	11672247	15436423
21	NAM_JL_21	δΤ	S_26785112	4	48.4	26785112	25174774	33478942	2	25174774	152837270	1.13e-09	0.01225	22.44	NA	4	CML247, NC358, OH7B, P39	-0.26	OH7B	0.54	P39	28318561	26450527	35084917	26450527	156410693
21	NAM_JL_21	γΤ	S_27272892	4	48.6	27272892	26297333	39862418	6	25174774	152837270	1.88e-19	0.01711	36.57	NA	8	CML247, CML333, HP301, MO18W, NC350, NC358, OH7B, P39	-4.49	MO18W	9.88	P39	28798788	27878724	41619424	26450527	156410693
21	NAM_JL_21	ΣT	S_29529943	4	49.5	29529943	26297333	34703896	2	25174774	152837270	1.18e-18	0.01836	34.82	NA	8	CML247, CML333, HP301, MO18W, MS71, NC358, OH7B, P39	-4.14	MO18W	12.2	P39	31071518	27878724	36493366	26450527	156410693
21	NAM_JL_21	γΤ3	S_40700355	4	54	40700355	31683942	67852994	1	25174774	152837270	1.1e-16	0.01181	31.41	NA	8	CML69, KI11, M37W, MS71, NC358, OH43, P39, TZI8	-2.25	OH43	2.88	P39	42454369	33117435	71477973	26450527	156410693
21	NAM_JL_21	ΣT3	S_40700355	4	54	40700355	35046238	43214166	2	25174774	152837270	1.06e-17	0.01448	32.35	NA	6	CML52, M162W, NC358, OH43, P39, TZI8	-2.09	NC358	5.41	P39	42454369	36675996	45022243	26450527	156410693
21	NAM_JL_21	ΣTT3	S_41538292	4	54.1	41538292	36793263	62388898	1	25174774	152837270	3.03e-24	0.02345	42.65	NA	5	CML322, MS71, NC350, NC358, P39	-5.67	NC358	18.46	P39	43284309	38246301	64906170	26450527	156410693
21	NAM_JL_21	αΤ3	S_75010949	4	56.6	75010949	65958274	123980124	4	25174774	152837270	1.55e-31	0.02463	51.01	chorismate mutase	9	B97, CML103, CML247, CML277, CML52, KY21, M162W, NC350, P39	-0.61	CML52	1.72	P39	77782668	68411701	126961658	26450527	156410693
21	NAM_JL_21	δΤ3	S_86504397	4	57.6	86504397	82893043	152837270	5	25174774	152837270	1.61e-15	0.0137149	32.7184	chorismate mutase	8	B97, CML247, CML322, Ki11, NC350, Oh43, Tx303, Tzi8	-0.169994	TZI8	0.34587	TX303	89899731	85967609	156410693	26450527	156410693
22	NAM_JL_22	αΤ	S_171741420	4	79	171741420	171637260	175214205	3	171637260	175214205	4.26e-16	0.01326	30.45	NA	6	KI11, KY21, MS71, OH43, P39, TZI8	-0.12	CML69	1.99	P39	174758959	174705693	178253462	174705693	178253462
23	NAM_JL_23	ΣTT3	S_2437804	5	5.4	2437804	35901	3432452	7	35901	3432452	1.38e-06	0.00979	17.91	NA	3	M37W, MO18W, NC350	-5.19	MO18W	2.33	OH7B	2511587	48254	3496545	48254	3496545
23	NAM_JL_23	δΤ3	S_1491318	5	1.7	1491318	1454324	1528313	1	35901	3432452	5.62e-16	0.0143447	35.4511	NA	8	CML228, CML247, Ky21, M162W, M37W, MS71, NC350, Oh43	-0.249874	CML228	0.0974905	CML277	1534417	1496576	1568705	48254	3496545
24	NAM_JL_24	δΤ3	S_18348509	5	48.9	18348509	16246784	25826608	2	16246784	29302344	1.69e-06	0.0106884	19.187	NA	4	CML103, CML247, Ky21, M162W	-0.0800801	KI3	0.152331	NC358	18826909	16722066	27680894	16722066	30828167
24	NAM_JL_24	γΤ3	S_22579093	5	52.6	22579093	18247118	25826608	9	16246784	29302344	5.38e-08	0.01021	19.4	NA	6	B97, CML69, IL14H, KI3, KY21, M162W	-2.47	CML69	2.54	M162W	23117069	18606928	27680894	16722066	30828167
24	NAM_JL_24	αΤ	S_24668030	5	53.9	24668030	19788296	29302344	4	16246784	29302344	1.55e-12	0.01064	25.7	NA	6	CML247, CML333, CML69, KY21, M162W, MS71	-0.92	CML247	1.04	CML69	25278020	20243128	30828167	16722066	30828167
24	NAM_JL_24	ΣTT3	S_25247319	5	54.1	25247319	23636328	25826608	5	16246784	29302344	2.88e-103	0.12266	138.56	NA	14	CML228, CML333, CML69, KI11, KY21, M162W, MO18W, MS71, NC350, NC358, OH43, OH7B, P39, TX303	-0.9	IL14H	19.56	KY21	25838824	24153386	27680894	16722066	30828167
24	NAM_JL_24	δΤ	S_25536964	5	54.2	25536964	24007357	25826608	6	16246784	29302344	1.15e-129	0.14404	167.62	NA	16	CML228, CML247, CML333, CML69, KI11, KI3, KY21, M162W, MO18W, MS71, NC350, NC358, OH43, OH7B, TX303, TZI8	-0.07	CML52	1.88	OH7B	26158397	24153386	27680894	16722066	30828167
24	NAM_JL_24	γΤ	S_25247319	5	54.1	25247319	24007357	25536964	7	16246784	29302344	9.88e-176	0.17525	224.5	NA	15	CML228, CML333, CML69, HP301, KI11, KI3, KY21, M162W, MO18W, MS71, NC350, NC358, OH43, OH7B, TX303	-0.45	CML52	15.33	KY21	25838824	24153386	26158397	16722066	30828167
24	NAM_JL_24	ΣT	S_25247319	5	54.1	25247319	24007357	25536964	3	16246784	29302344	1.09e-177	0.17926	222.49	NA	16	CML228, CML333, CML69, KI11, KI3, KY21, M162W, MO18W, MS71, NC350, NC358, OH43, OH7B, P39, TX303, TZI8	-0.18	CML247	17.99	OH7B	25838824	24153386	26158397	16722066	30828167
25	NAM_JL_25	ΣT3	S_59819753	5	62.8	59819753	43085171	70944663	1	43085171	74884567	8.58e-07	0.01995	17.36	arogenate/prephenate dehydrogenase family protein, arogenate/prephenate dehydrogenase family protein	7	CML69, KI3, KY21, M162W, M37W, OH43, P39	-3.04	CML69	2.6	M162W	61455721	44362313	72953906	44362313	77092963
25	NAM_JL_25	αΤ3	S_73132746	5	65.9	73132746	45518135	74884567	4	43085171	74884567	6.34e-16	0.01551	30.98	Light harvesting-like protein 3, arogenate/prephenate dehydrogenase family protein, arogenate/prephenate dehydrogenase family protein	3	M37W, NC350, P39	-1.56	P39	0.65	M37W	75275296	46391582	77092963	44362313	77092963
26	NAM_JL_26	γΤ	S_90566175	5	69.5	90566175	81355643	161277493	1	81355643	161277493	2.97e-07	0.01294	19.09	chorismate mutase, tyrosine transaminase, 4-hydroxyphenylpyruvate dioxygenase, tocopherol cyclase (VTE1)	2	CML228, CML277	-2.15	KY21	6.9	CML277	92899360	83528861	165099165	83528861	165099165
26	NAM_JL_26	ΣTT3	S_84885005	5	68.7	84885005	81355643	112928392	6	81355643	161277493	5.27e-23	0.03155	41.03	chorismate mutase, 4-hydroxyphenylpyruvate dioxygenase	6	CML103, CML228, CML277, M162W, NC358, TZI8	-3.16	P39	15.87	CML277	87114592	83528861	115749163	83528861	165099165
26	NAM_JL_26	δΤ3	S_83712444	5	68.5	83712444	82655179	84251695	1	81355643	161277493	9.15e-126	0.107287	182.201	4-hydroxyphenylpyruvate dioxygenase	19	B97, CML103, CML228, CML277, CML322, CML333, CML52, CML69, Il14H, Ki11, M162W, Mo18W, MS71, NC350, NC358, Oh7B, P39, Tx303, Tzi8	-0.0564927	CML69	0.0477863	NC350	86478713	84830095	86478713	83528861	165099165
26	NAM_JL_26	γΤ3	S_84251695	5	68.6	84251695	83360023	86151625	2	81355643	161277493	1.1e-112	0.07949	144.13	4-hydroxyphenylpyruvate dioxygenase	17	CML103, CML228, CML277, CML322, CML333, CML52, CML69, KI11, KY21, M162W, M37W, NC350, NC358, OH43, P39, TX303, TZI8	-2.78	P39	6.09	CML277	86478713	84830095	88451532	83528861	165099165
26	NAM_JL_26	ΣT3	S_84251695	5	68.6	84251695	83360023	86151625	2	81355643	161277493	1.11e-59	0.09744	82.46	4-hydroxyphenylpyruvate dioxygenase	13	CML103, CML228, CML277, CML322, CML333, CML52, CML69, KI11, M162W, M37W, NC358, OH43, TZI8	-1.84	NC350	9.08	CML277	86478713	84830095	88451532	83528861	165099165
26	NAM_JL_26	ΣT	S_145388055	5	72.3	145388055	84885005	152278149	1	81355643	161277493	3.81e-09	0.01456	21.61	chorismate mutase, tocopherol cyclase (VTE1)	4	CML277, CML322, CML52, KY21	-3.62	KY21	7.6	CML277	148816139	87114592	155995297	83528861	165099165
26	NAM_JL_26	δΤ	S_133824940	5	70.9	133824940	131735285	147791983	5	81355643	161277493	4.41e-35	0.04602	55.83	tocopherol cyclase (VTE1)	11	B97, CML103, CML277, HP301, IL14H, KY21, M37W, NC350, OH43, OH7B, P39	-0.74	OH7B	0.6	CML277	137135296	135068560	151314207	83528861	165099165
27	NAM_JL_27	δΤ	S_196287168	5	103.8	196287168	190183522	196670597	2	190183522	196670597	9.45e-10	0.02328	22.55	2-C-methyl-D-erythritol 2,4-cyclodiphosphate synthase	6	CML247, CML52, CML69, KY21, M162W, P39	-0.16	NC350	0.46	P39	201468854	195331049	201868522	195331049	201868522
28	NAM_JL_28	γΤ	S_200161433	5	106.7	200161433	198843364	200923752	3	198843364	200923752	6.85e-33	0.02838	54.04	gamma-tocopherol methyltransferase (VTE4)	9	B97, CML322, IL14H, KI3, M37W, MO18W, NC350, P39, TX303	-5.51	NC350	6.79	TX303	205519507	204017222	206496253	204017222	206496253
28	NAM_JL_28	αΤ	S_200356718	5	106.8	200356718	200161433	200552003	7	198843364	200923752	0	0.48183	755.11	gamma-tocopherol methyltransferase (VTE4)	21	B97, CML228, CML247, CML277, CML322, CML333, CML52, CML69, HP301, IL14H, KI11, KY21, M162W, M37W, MO18W, MS71, NC350, NC358, OH7B, P39, TX303	-7.93	CML322	3.65	NC350	205815100	205519507	206004584	204017222	206496253
28	NAM_JL_28	αΤ3	S_200356718	5	106.8	200356718	200161433	200552003	3	198843364	200923752	0	0.32003	494.94	gamma-tocopherol methyltransferase (VTE4)	23	B97, CML103, CML228, CML247, CML277, CML322, CML333, CML52, CML69, HP301, IL14H, KI11, KI3, KY21, M162W, M37W, MO18W, MS71, OH43, OH7B, P39, TX303, TZI8	-3.67	CML228	0.33	NC358	205815100	205519507	206004584	204017222	206496253
28	NAM_JL_28	γΤ3	S_200356718	5	106.8	200356718	200161433	200613961	3	198843364	200923752	1.89e-74	0.04158	100.56	gamma-tocopherol methyltransferase (VTE4)	18	B97, CML103, CML228, CML277, CML322, CML333, CML69, HP301, IL14H, KI11, KY21, M162W, MO18W, MS71, OH43, OH7B, P39, TX303	-0.64	NC350	3.72	P39	205815100	205519507	206273925	204017222	206496253
29	NAM_JL_29	ΣTT3	S_204322970	5	111.9	204322970	202278000	205308574	3	202278000	205308574	2.2e-06	0.01004	17.58	NA	4	CML322, CML333, CML52, TZI8	-5.65	TZI8	2.4	OH43	209714731	207725594	210939309	207725594	210939309
29	NAM_JL_29	δΤ3	S_204809285	5	114	204809285	204541128	205108929	6	202278000	205308574	1.72e-46	0.0334677	71.9058	NA	17	B97, CML103, CML247, CML277, CML322, CML333, CML69, Ki11, Ki3, Ky21, M162W, M37W, MS71, NC350, NC358, Oh43, Tx303	-0.492844	CML69	-0.0107841	CML52	210207569	209996614	210736980	207725594	210939309
29	NAM_JL_29	δΤ	S_204809285	5	114	204809285	204759286	205009106	1	202278000	205308574	4.05e-18	0.03292	34.17	NA	8	CML103, CML247, CML333, CML52, CML69, KI11, KY21, TZI8	-0.53	KI3	0.11	OH7B	210207569	210257566	210736980	207725594	210939309
30	NAM_JL_30	ΣT	S_75052175	6	10.3	75052175	34223940	89356942	1	34223940	89356942	8.29e-07	0.00969	18.03	arogenate/prephenate dehydrogenase family protein	3	CML322, CML52, KI11	-3.62	CML52	4.47	KI11	76796674	35740519	92090805	35740519	92090805
30	NAM_JL_30	ΣTT3	S_75052175	6	10.3	75052175	35896206	88880160	3	34223940	89356942	1.4e-09	0.01367	22.55	arogenate/prephenate dehydrogenase family protein	5	B97, CML322, CML52, NC350, P39	-4.86	B97	3.9	CML322	76796674	37482100	91590719	35740519	92090805
30	NAM_JL_30	γΤ	S_75052175	6	10.3	75052175	36687337	89356942	2	34223940	89356942	2.62e-08	0.01018	20.75	arogenate/prephenate dehydrogenase family protein	4	CML322, CML52, CML69, KI11	-3.09	CML52	4.02	KI11	76796674	38417588	92090805	35740519	92090805
30	NAM_JL_30	δΤ3	S_72953671	6	10.1	72953671	66658160	74002923	2	34223940	89356942	1.13e-32	0.0271945	60.3795	NA	15	B97, CML228, CML277, CML52, CML69, Il14H, Ki11, Ki3, M162W, M37W, NC350, NC358, Oh7B, P39, Tzi8	-0.409822	CML277	0.0233976	TX303	76796674	69642712	76796674	35740519	92090805
30	NAM_JL_30	γΤ3	S_82648835	6	11.5	82648835	70855167	88760964	5	34223940	89356942	9.98e-44	0.02537	64.73	arogenate/prephenate dehydrogenase family protein	16	B97, CML228, CML277, CML52, CML69, HP301, IL14H, KI11, M37W, MS71, NC350, NC358, OH43, OH7B, P39, TZI8	-2.88	CML228	-0.07	CML333	85388415	73741563	91590719	35740519	92090805
30	NAM_JL_30	ΣT3	S_82648835	6	11.5	82648835	74002923	88164985	7	34223940	89356942	1.33e-38	0.02679	57.91	arogenate/prephenate dehydrogenase family protein	15	B97, CML228, CML277, CML52, CML69, HP301, IL14H, KI11, M37W, MS71, NC350, NC358, OH7B, P39, TZI8	-3.41	CML228	0.89	M162W	85388415	76796674	91590719	35740519	92090805
31	NAM_JL_31	ΣTT3	S_109778922	6	32.8	109778922	102594606	117482739	5	102594606	118806879	4.98e-06	0.01788	16.99	NA	4	CML247, CML52, CML69, OH7B	-7.19	CML69	2.23	KY21	114631107	105841566	121558291	105841566	122925827
31	NAM_JL_31	αΤ3	S_108288402	6	31.9	108288402	104313684	110809394	2	102594606	118806879	1.68e-08	0.00987	20.52	NA	6	B97, CML228, CML277, CML322, CML52, OH7B	-0.86	CML277	0.52	CML322	112721753	107596090	111081064	105841566	122925827
31	NAM_JL_31	δΤ	S_108619629	6	32.1	108619629	108122789	109778922	2	102594606	118806879	8.81e-17	0.01793	32.38	NA	7	CML247, CML322, CML52, CML69, KI11, OH7B, TZI8	-0.43	CML69	0.14	CML277	113282158	112721753	114631107	105841566	122925827
31	NAM_JL_31	γΤ	S_118012160	6	43.2	118012160	111052280	118260066	3	102594606	118806879	8.14e-18	0.01904	34.36	NA	7	CML322, CML69, IL14H, KI11, KY21, NC350, OH7B	-5.74	CML322	1.79	MO18W	121980979	111331168	122429908	105841566	122925827
31	NAM_JL_31	ΣT	S_117936528	6	43.1	117936528	111052280	118806879	3	102594606	118806879	1.71e-15	0.01887	30.59	NA	6	CML322, CML69, IL14H, KY21, NC350, OH7B	-6.07	CML322	2.59	MO18W	121905644	111331168	122925827	105841566	122925827
31	NAM_JL_31	δΤ3	S_111902384	6	36.5	111902384	111740460	111942865	0	102594606	118806879	4.06e-09	0.0109788	26.3632	NA	5	CML103, CML247, CML69, Hp301, Tzi8	-0.261194	CML103	0.142174	CML277	115744853	114793204	115827920	105841566	122925827
32	NAM_JL_32	ΣTT3	S_127663433	6	47.2	127663433	120923380	131675710	1	120923380	147139682	1.76e-08	0.02161	20.89	NA	5	CML322, IL14H, KY21, NC350, TZI8	-8.32	KY21	3.94	TX303	131653878	124797563	135762786	124797563	151184991
32	NAM_JL_32	ΣT3	S_132730267	6	51.1	132730267	130357851	147139682	5	120923380	147139682	4.6e-08	0.0087	19.26	1-deoxy-D-xylulose 5-phosphate synthase 1 (dxs1), isopentenyl pyrophosphate isomerase, ABC kinase (tocopherol cyclase kinase)	8	CML103, CML277, CML333, IL14H, KY21, M162W, M37W, TX303	-1.7	M162W	2.99	CML277	136869611	134433450	151184991	124797563	151184991
32	NAM_JL_32	γΤ3	S_132730267	6	51.1	132730267	131287180	140913988	2	120923380	147139682	1.41e-12	0.00993	25.92	ABC kinase (tocopherol cyclase kinase)	8	CML103, CML247, CML277, CML333, KY21, M162W, M37W, TX303	-1.5	KY21	3.25	CML277	136869611	135335603	145007105	124797563	151184991
32	NAM_JL_32	αΤ	S_140347572	6	54.4	140347572	137079554	141222006	6	120923380	147139682	7.44e-18	0.01318	32.73	NA	6	CML103, CML277, CML322, CML69, IL14H, P39	-1.57	IL14H	0.8	CML103	144427661	141206267	145335326	124797563	151184991
33	NAM_JL_33	γΤ	S_157048924	6	76.4	157048924	156788274	157570224	2	156788274	162017583	2.65e-09	0.01157	22.27	NA	7	CML103, CML277, CML52, IL14H, M37W, NC350, TZI8	-3.59	TZI8	3.97	NC350	161187954	160736336	161707488	160736336	166210852
33	NAM_JL_33	ΣT	S_157048924	6	76.4	157048924	156788274	158446364	3	156788274	162017583	1.39e-07	0.01086	19.25	NA	7	CML103, CML277, CML52, IL14H, M37W, NC350, TZI8	-4.38	TZI8	3.6	CML103	161187954	160736336	162599516	160736336	166210852
33	NAM_JL_33	δΤ	S_159984809	6	83.9	159984809	156853436	161454721	2	156788274	162017583	8.34e-08	0.01095	19.62	NA	3	MO18W, NC350, TZI8	-0.25	CML277	0.38	MO18W	164122733	160736336	165632631	160736336	166210852
33	NAM_JL_33	δΤ3	S_160013836	6	84	160013836	159143019	160362164	1	156788274	162017583	2.44e-09	0.0104906	21.9624	NA	7	CML103, CML228, CML322, CML69, Ki3, NC358, P39	-0.117286	M162W	0.312861	CML228	164180779	163320424	164528122	160736336	166210852
33	NAM_JL_33	αΤ3	S_161454721	6	86.6	161454721	159433291	162017583	7	156788274	162017583	2.8e-09	0.0104	21.68	NA	5	B97, CML333, M162W, MO18W, P39	-0.93	M162W	0.82	B97	165632631	163591669	166210852	160736336	166210852
35	NAM_JL_35	ΣTT3	S_10636101	7	35.4	10636101	9713095	16216515	12	9713095	16759756	4.51e-27	0.02474	46.3	1-deoxy-D-xylulose 5-phosphate synthase 2 (dxs2)	5	CML247, CML277, CML333, KY21, M162W	-13.27	KY21	3.54	OH43	10918569	9997160	17001871	9997160	17429982
35	NAM_JL_35	δΤ3	S_13934903	7	40.5	13934903	13500310	14260847	2	9713095	16759756	2.43e-34	0.0569664	65.8041	1-deoxy-D-xylulose 5-phosphate synthase 2 (dxs2)	7	B97, CML247, CML333, Il14H, Ky21, MS71, Tx303	-0.500037	KY21	0.292213	TX303	14340434	13928484	14779346	9997160	17429982
35	NAM_JL_35	γΤ3	S_14043551	7	40.6	14043551	13826254	14804088	8	9713095	16759756	3.23e-108	0.05464	139.07	1-deoxy-D-xylulose 5-phosphate synthase 2 (dxs2)	12	B97, CML103, CML228, CML247, CML277, CML333, IL14H, KI3, KY21, M162W, MS71, P39	-9.09	KY21	0.11	MO18W	14454658	14072218	15404808	9997160	17429982
35	NAM_JL_35	ΣT3	S_13934903	7	40.5	13934903	13826254	14260847	6	9713095	16759756	1.13e-95	0.05638	123.32	1-deoxy-D-xylulose 5-phosphate synthase 2 (dxs2)	8	CML228, CML247, CML277, CML333, KY21, M162W, MS71, P39	-9.72	KY21	0.6	CML52	14340434	14072218	14779346	9997160	17429982
36	NAM_JL_36	δΤ	S_34185670	7	48.1	34185670	21533038	95082473	5	21533038	100537159	6.05e-27	0.02488	45.62	chlorophyllase, 4-hydroxyphenylpyruvate dioxygenase	7	CML69, KI3, M162W, MO18W, NC350, OH43, TZI8	-0.2	TZI8	0.64	NC350	35460758	22594359	98080764	22594359	103709672
36	NAM_JL_36	δΤ3	S_31773777	7	48	31773777	28947763	41228241	8	21533038	100537159	2.72e-42	0.069631	72.3791	NA	11	B97, CML103, CML277, CML69, Ki3, Ky21, M162W, M37W, Mo18W, MS71, NC350	-0.253819	TX303	0.628428	M162W	33002577	29228505	42749789	22594359	103709672
36	NAM_JL_36	αΤ3	S_84844392	7	49.3	84844392	83746850	100537159	2	21533038	100537159	1.69e-44	0.03264	66.87	NA	7	CML247, KY21, M162W, MO18W, NC350, NC358, TZI8	-2.56	CML247	0.42	TX303	87799563	85542282	103709672	22594359	103709672
37	NAM_JL_37	γΤ	S_129999310	7	64.4	129999310	129919240	130079380	0	129919240	130079380	2.34e-09	0.01051	22.35	NA	6	CML103, CML322, CML333, CML69, M162W, NC358	-3.39	CML69	2.23	KI3	134034178	133731455	134175596	133731455	134175596
38	NAM_JL_38	αΤ	S_140150735	7	73	140150735	137555430	141721917	6	137555430	141721917	2.45e-27	0.01844	44.64	NA	11	CML247, CML333, HP301, KI11, KI3, M162W, M37W, MS71, OH43, P39, TX303	-0.02	CML277	1.34	KI3	144713130	140466129	146618549	140466129	146618549
39	NAM_JL_39	αΤ3	S_171757675	7	121.1	171757675	171033207	172742686	4	171033207	172742686	1.73e-12	0.01216	26.28	NA	8	B97, CML103, CML52, KY21, M162W, NC350, NC358, TZI8	-0.66	B97	B97	TZI8	179010569	176663508	178135615	176663508	178135615
40	NAM_JL_40	ΣTT3	S_9998058	8	25.7	9998058	9328910	11915756	6	9328910	11915756	8.77e-07	0.01027	18.23	NA	6	CML228, CML52, IL14H, M162W, M37W, MS71	-5.33	CML228	3.49	M162W	10368241	9686656	12302728	9686656	12302728
41	NAM_JL_41	γΤ	S_136940374	8	70	136940374	118035019	139636243	2	118035019	146051789	1.68e-15	0.01473	31.19	NA	8	CML247, CML277, CML69, HP301, IL14H, M37W, MO18W, NC350	-5.13	M37W	1.94	OH7B	140967406	120968877	143830754	120968877	150527583
41	NAM_JL_41	δΤ3	S_144742598	8	73.5	144742598	130983626	146051789	3	118035019	146051789	3.02e-06	0.00784153	20.7052	NA	4	CML247, CML69, Oh7B, P39	-0.158146	OH7B	0.195598	CML228	148989897	134879003	150527583	120968877	150527583
41	NAM_JL_41	ΣT	S_143642609	8	72.8	143642609	135456888	143956891	0	118035019	146051789	2.01e-18	0.01808	34.52	NA	9	CML247, CML322, CML333, IL14H, KI11, M37W, MO18W, NC350, NC358	-6.5	M37W	1.05	M162W	148042286	139413092	148358988	120968877	150527583
41	NAM_JL_41	ΣTT3	S_143642609	8	72.8	143642609	138794731	144585457	6	118035019	146051789	4.88e-12	0.01493	26.14	NA	9	CML247, CML277, CML322, CML333, CML69, IL14H, M37W, MO18W, NC350	-5.88	M37W	0.56	CML228	148042286	142926663	148989897	120968877	150527583
41	NAM_JL_41	αΤ	S_141756913	8	71.6	141756913	139075235	141914055	3	118035019	146051789	3.03e-32	0.02101	50.62	NA	13	CML103, CML247, CML333, CML52, CML69, KI3, KY21, M37W, MO18W, NC350, NC358, TX303, TZI8	-1.19	CML333	-0.06	MS71	145771843	142926663	146095832	120968877	150527583
42	NAM_JL_42	ΣT3	S_170044134	8	114.2	170044134	169614507	171682681	7	169614507	171682681	1.21e-12	0.0113	25.7	NA	5	CML277, CML322, CML333, M37W, MS71	-2.64	CML333	1.84	CML277	175277626	174762889	176956509	174762889	176956509
43	NAM_JL_43	δΤ3	S_173232589	8	128	173232589	171893959	175083602	5	171893959	175758134	1.52e-12	0.0119671	24.1976	chorismate mutase, chorismate mutase	8	CML247, CML322, M162W, M37W, Oh7B, P39, Tx303, Tzi8	-0.267196	M162W	0.114341	MO18W	178495742	177174902	180380977	177174902	181068710
43	NAM_JL_43	γΤ3	S_173232589	8	128	173232589	172426083	175758134	2	171893959	175758134	2.91e-12	0.00959	25.49	chorismate mutase, chorismate mutase	9	CML277, CML322, CML333, CML69, M162W, M37W, MS71, TX303, TZI8	-1.72	M37W	1.28	CML277	178495742	177737151	181068710	177174902	181068710
43	NAM_JL_43	αΤ3	S_173864256	8	129.7	173864256	173232589	175758134	3	171893959	175758134	1.49e-08	0.0097	20.6	NA	4	B97, CML52, MO18W, P39	-0.75	P39	0.91	B97	179100846	178495742	181068710	177174902	181068710
45	NAM_JL_45	αΤ	S_27141915	9	43.6	27141915	26513216	79020828	3	26513216	103270182	4.77e-24	0.01656	40.57	arogenate/prephenate dehydrogenase family protein, homogentisate 1,2-dioxygenase	12	CML247, CML322, CML333, CML69, IL14H, KY21, M162W, MO18W, MS71, NC350, OH43, P39	-0.4	TZI8	1.13	IL14H	27388431	26401624	82156150	26401624	107492725
45	NAM_JL_45	δΤ	S_31124337	9	44.6	31124337	26827565	32381370	4	26513216	103270182	8e-41	0.03508	62.9	homogentisate 1,2-dioxygenase	9	CML228, CML277, CML333, KI11, KI3, MO18W, NC350, OH7B, TX303	-0.13	P39	0.92	CML277	33793341	26900613	33793341	26401624	107492725
45	NAM_JL_45	ΣT	S_94334531	9	47.4	94334531	64655337	101476999	1	26513216	103270182	3.4e-30	0.03217	49.65	homogentisic acid geranylgeranyl transferase 1 (HGGT1)	12	CML103, CML228, CML277, CML333, CML69, KI11, KI3, KY21, MO18W, NC350, OH7B, TX303	-3.15	P39	10.09	CML277	97762955	53957832	104955799	26401624	107492725
45	NAM_JL_45	αΤ3	S_87459733	9	46.3	87459733	70707583	90390211	1	26513216	103270182	3.26e-43	0.03158	65.31	NA	11	B97, CML103, CML228, CML277, CML333, CML52, KI11, KY21, M37W, MO18W, MS71	-1.82	M37W	1.37	CML228	90821004	59209999	94362502	26401624	107492725
45	NAM_JL_45	γΤ	S_94334531	9	47.4	94334531	70707583	103270182	1	26513216	103270182	2.42e-27	0.02773	46.94	homogentisic acid geranylgeranyl transferase 1 (HGGT1)	11	CML103, CML228, CML247, CML277, KI11, KI3, KY21, MO18W, NC350, OH7B, TX303	-2.34	CML247	9.13	CML277	97762955	59209999	107492725	26401624	107492725
45	NAM_JL_45	ΣTT3	S_94016922	9	47.3	94016922	88651842	94969750	5	26513216	103270182	9.37e-116	0.08994	153.24	homogentisic acid geranylgeranyl transferase 1 (HGGT1)	14	CML228, CML247, CML277, CML322, CML333, CML52, HP301, IL14H, KI11, KI3, M37W, OH7B, P39, TZI8	-10.63	M37W	27.71	CML277	97441369	92008707	98350862	26401624	107492725
45	NAM_JL_45	δΤ3	S_92175763	9	47	92175763	89810755	94969750	2	26513216	103270182	0	0.239764	469.689	homogentisic acid geranylgeranyl transferase 1 (HGGT1)	20	CML103, CML228, CML247, CML277, CML322, CML333, CML52, Hp301, Il14H, Ki11, Ky21, M162W, M37W, Mo18W, MS71, NC350, Oh43, P39, Tx303, Tzi8	-0.70117	KI11	1.66878	CML277	95580255	93173734	98350862	26401624	107492725
45	NAM_JL_45	γΤ3	S_92175763	9	47	92175763	90969822	93381704	2	26513216	103270182	0	0.40171	731.3	homogentisic acid geranylgeranyl transferase 1 (HGGT1)	22	B97, CML103, CML228, CML247, CML277, CML322, CML333, CML52, CML69, HP301, IL14H, KI11, KY21, M162W, M37W, MO18W, NC350, NC358, OH43, P39, TX303, TZI8	-12.86	KI11	11.49	CML277	95580255	94362502	96809320	26401624	107492725
45	NAM_JL_45	ΣT3	S_92175763	9	47	92175763	90969822	93381704	1	26513216	103270182	0	0.38976	637.22	homogentisic acid geranylgeranyl transferase 1 (HGGT1)	22	B97, CML103, CML228, CML247, CML277, CML322, CML333, CML52, CML69, HP301, IL14H, KI11, KY21, M162W, M37W, MO18W, NC350, NC358, OH43, P39, TX303, TZI8	-14.92	KI11	14.35	CML277	95580255	94362502	96809320	26401624	107492725
46	NAM_JL_46	γΤ	S_138294095	9	70	138294095	136183259	139884188	5	136183259	139884188	1.32e-08	0.0128	21.21	arogenate/prephenate dehydratase	4	CML333, M37W, OH43, P39	-2.82	TX303	6.18	P39	140822889	138759772	142598961	138759772	142598961
46	NAM_JL_46	ΣT	S_138294095	9	70	138294095	136266228	138421302	6	136183259	139884188	9.9e-10	0.01487	22.48	arogenate/prephenate dehydratase	7	B97, CML322, CML333, IL14H, M37W, OH43, P39	-2.85	TX303	CML322	P39	140822889	138759772	141017490	138759772	142598961
47	NAM_JL_47	δΤ	S_149164320	9	93.4	149164320	147959640	150066896	7	147959640	150066896	1.82e-17	0.01835	33.3	NA	8	CML103, CML228, CML247, CML322, CML69, KI11, NC350, P39	-0.54	CML69	0.26	OH7B	152292113	150974208	153305384	150974208	153305384
48	NAM_JL_48	αΤ3	S_9441157	10	24.8	9441157	6724523	10479177	3	6724523	10479177	1.18e-14	0.01743	29.26	NA	5	B97, M162W, MO18W, NC358, TX303	-1.22	B97	0.29	CML333	9412156	6481636	10510551	6481636	10510551
49	NAM_JL_49	ΣTT3	S_14993749	10	32.5	14993749	11613624	16038485	3	11613624	75099299	7.43e-12	0.01404	25.88	NA	6	CML69, IL14H, KI11, KY21, OH43, TZI8	-3.85	CML277	6.33	TZI8	14975537	11727904	16407615	11727904	74347712
49	NAM_JL_49	γΤ	S_24852570	10	35.4	24852570	11718059	75099299	3	11613624	75099299	1.26e-20	0.01843	38.14	shikimate biosynthesis protein aroDE, maleylacetoacetate isomerase	9	B97, CML52, CML69, IL14H, KI11, KY21, M37W, OH43, TZI8	-2.62	CML228	5.43	KI11	25485381	11839013	74347712	11727904	74347712
49	NAM_JL_49	ΣT	S_24852570	10	35.4	24852570	11718059	66651354	5	11613624	75099299	4.52e-17	0.01769	32.71	shikimate biosynthesis protein aroDE, maleylacetoacetate isomerase	7	B97, IL14H, KI11, KY21, M37W, OH43, TZI8	-2.73	CML228	6.28	KI11	25485381	11839013	65899173	11727904	74347712
49	NAM_JL_49	γΤ3	S_14819626	10	32.4	14819626	13075719	24103436	1	11613624	75099299	1.03e-13	0.01019	27.47	NA	5	CML103, CML333, CML69, KY21, M162W	-1.63	CML277	2.26	M162W	14975537	13233185	24692105	11727904	74347712
49	NAM_JL_49	δΤ3	S_16505881	10	33.3	16505881	16212608	23354302	1	11613624	75099299	2.45e-13	0.012666	28.962	NA	6	CML103, CML69, Ky21, M162W, Mo18W, NC358	-0.233957	MO18W	0.274209	CML69	16712379	16407615	23859400	11727904	74347712
50	NAM_JL_50	δΤ	S_78533820	10	38.7	78533820	78105936	78961704	0	78105936	78961704	1.71e-09	0.01212	22.17	NA	6	CML228, KI11, M162W, OH43, TX303, TZI8	-0.42	TX303	0.29	KI11	77949017	77491117	78377244	77491117	78377244
51	NAM_JL_51	ΣT3	S_108093611	10	43.9	108093611	82812658	115434207	5	82812658	115434207	9.19e-15	0.0126	28.52	arogenate/prephenate dehydratase	10	B97, CML247, CML277, CML333, KY21, MO18W, MS71, NC350, NC358, OH7B	-3.33	CML277	1.88	KY21	108812133	82638027	116497746	82638027	116497746
51	NAM_JL_51	αΤ3	S_113911262	10	45.4	113911262	92133622	115434207	3	82812658	115434207	4.57e-10	0.0145	22.83	arogenate/prephenate dehydratase	3	M162W, NC350, P39	-1.48	NC350	0.4	CML52	114192697	92330802	116497746	82638027	116497746
52	NAM_JL_52	ΣTT3	S_145163581	10	83.8	145163581	142659844	145448036	5	142659844	145551473	1.3e-11	0.01439	25.53	NA	5	CML322, CML52, M37W, NC350, NC358	-7.53	CML322	1.94	OH43	145839449	143441108	146208876	143441108	146274879
52	NAM_JL_52	δΤ	S_144982565	10	83.1	144982565	144499193	145189441	7	142659844	145551473	1.43e-24	0.02455	42.59	NA	8	CML103, CML228, CML277, CML322, CML52, KI11, M37W, NC350	-0.45	NC350	0.2	MO18W	145718179	145157842	145888592	143441108	146274879
52	NAM_JL_52	ΣT	S_144982565	10	83.1	144982565	144499193	145551473	3	142659844	145551473	9.05e-18	0.01841	33.65	NA	7	CML103, CML277, CML322, CML333, M37W, NC350, NC358	-6.53	CML322	1.84	OH43	145718179	145157842	146274879	143441108	146274879
52	NAM_JL_52	γΤ	S_144982565	10	83.1	144982565	144616587	145473895	3	142659844	145551473	3.41e-20	0.01902	37.56	NA	6	CML103, CML277, CML322, CML52, M37W, NC350	-6.17	CML322	1.65	B97	145718179	145316319	146236124	143441108	146274879
